# Supplementary material
Source: PubMed Central journal article supplement (PMC2992251)
Supplement: supp_M110.127753_jbc.M110.127753-1.pdf [file supp_M110.127753_jbc.M110.127753-1.pdf]

## SUPPLEMENTARY FIGURES

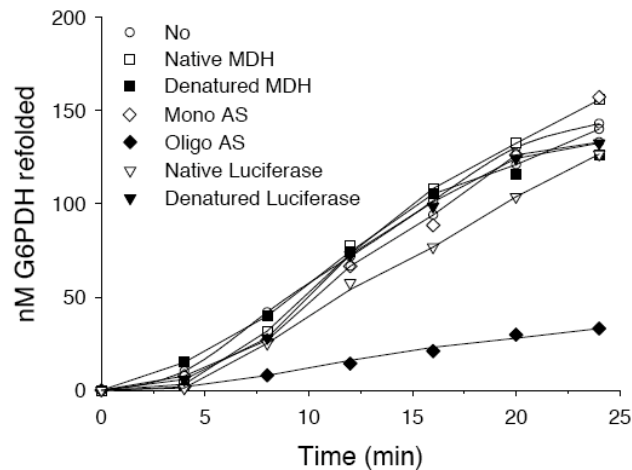

SUPPLEMENTAL FIG. S1. The inhibition of the G6PDH refolding is specific to oligomeric species. Time-dependent reactivation of heat pre-aggregated G6PDH by the DnaK chaperone machinery was performed as in Figure 4. Heat pre-aggregated G6PDH (0,75  $\mu\text{M}$ , ie 38  $\mu\text{g}/\text{mL}$ ) was incubated in absence (opened circles) or in presence of 58  $\mu\text{g}/\text{mL}$  Malate dehydrogenase (MDH) (native or heat-denatured, (squares)), or with 58  $\mu\text{g}/\text{mL}$  Luciferase (native or cold-denatured, (triangles)), or with 58  $\mu\text{g}/\text{mL}$   $\alpha$ -synuclein (monomeric or oligomeric, (diamonds)).

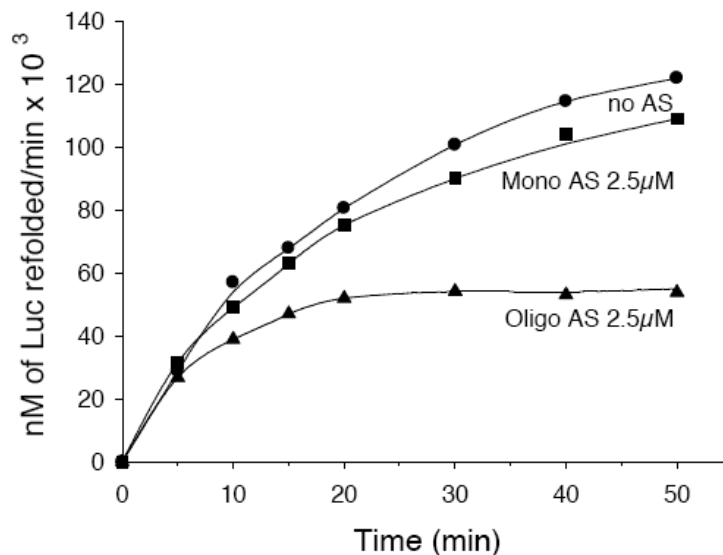

SUPPLEMENTAL FIG. S2. The oligomeric species of  $\alpha$ -synuclein inhibit the refolding of freeze-inactivated luciferase mediated by the DnaK chaperone system. Time-dependent reactivation of freeze-inactivated luciferase (0,5 $\mu\text{M}$ ) by the DnaK chaperone system (2,5 $\mu\text{M}$  DnaK, 0,5  $\mu\text{M}$  DnaJ, 0,5  $\mu\text{M}$  GrpE), in absence (circles) or in presence of either 2,5 $\mu\text{M}$  oligomeric  $\alpha$ -synuclein (triangles) or 2,5 $\mu\text{M}$  monomeric  $\alpha$ -synuclein (squares). 5 mM ATP were supplemented at time 0min, and aliquots were assayed for Luciferase activity at the indicated time points, as described in Sharma *et al*, 2008.

A

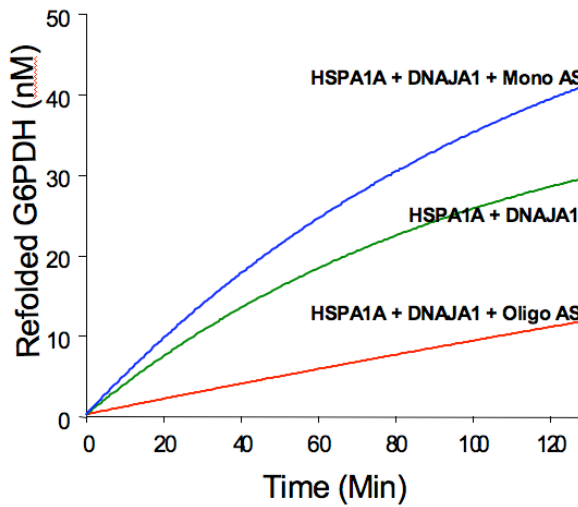

B

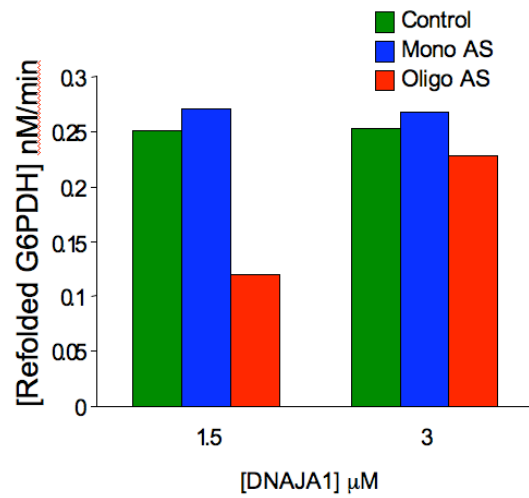

SUPPLEMENTAL FIG. S3.  $\alpha$ -Syn oligomers inhibit human Hsp70/40 chaperone mediated refolding of heat denatured G6PDH. G6PDH (750 nM) was heat-denatured 7 minutes at 52°C without chaperones, as in Diamant et al., 2000, then supplemented with purified recombinant human HSP70 (HSPA1A, 5  $\mu$ M) and Hsp40 (DNAJA1, 1  $\mu$ M), without (green line), or with 4  $\mu$ M monomeric  $\alpha$ -syn (blue line) or 4  $\mu$ M oligomeric  $\alpha$ -syn (red line). The reaction was initiated by addition of 5 mM ATP. *A*, time-dependent refolding of G6PDH at 30°C. *B*, refolding rates in the presence of 5  $\mu$ M HSPA1A and 1.5 or 3.0  $\mu$ M DNAJA1.

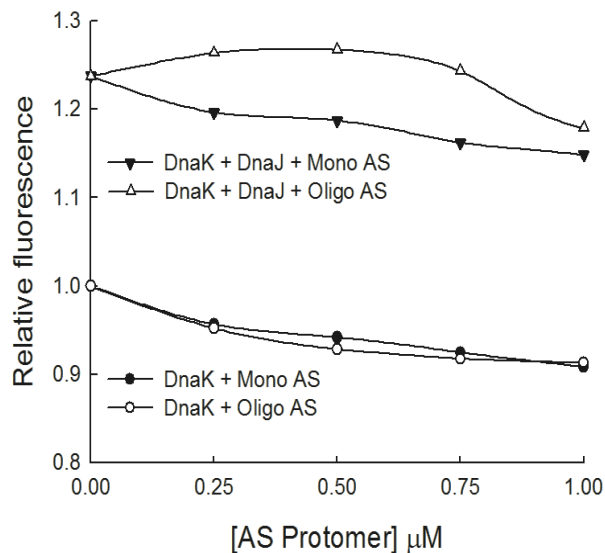

SUPPLEMENTAL FIG. S4: Steady-state tryptophan fluorescence using a LS50 spectrofluorimeter from Perkin Elmer. 1  $\mu$ M DnaK in refolding buffer was incubated at 25°C in the presence of 1 mM ATP, 5  $\mu$ g/ml pyruvate kinase and 4 mM PEP, without or with of 0.5  $\mu$ M DnaJ and increasing concentrations of monomeric or oligomeric  $\alpha$ -syn, as indicated (concentrations expressed in protomers). Excitation was at 300 nm and emission at 348 nm.

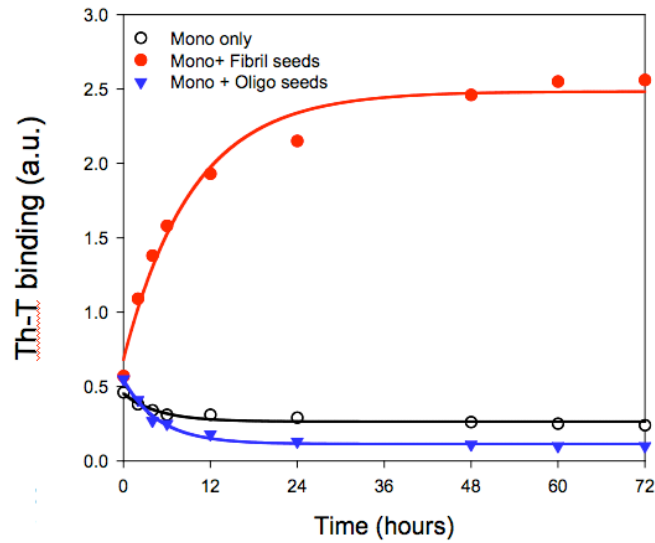

SUPPLEMENTAL FIG. S5.  $\alpha$ -Syn oligomers do not seed the fibrilization of  $\alpha$ -Syn monomers.  $\alpha$ -Syn monomers (50  $\mu$ M; black line) were incubated at 37°C for the indicated time without or with freshly sonicated  $\alpha$ -syn fibrils (10  $\mu$ M protomers; red line) or  $\alpha$ -Syn oligomers (1  $\mu$ M protomers; blue line). At indicated times, fibril formation was measured by fluorescence in the presence of 60  $\mu$ M ThT (excitation: 450 nm; emission: 485 nm) and expressed in arbitrary units (a.u.).

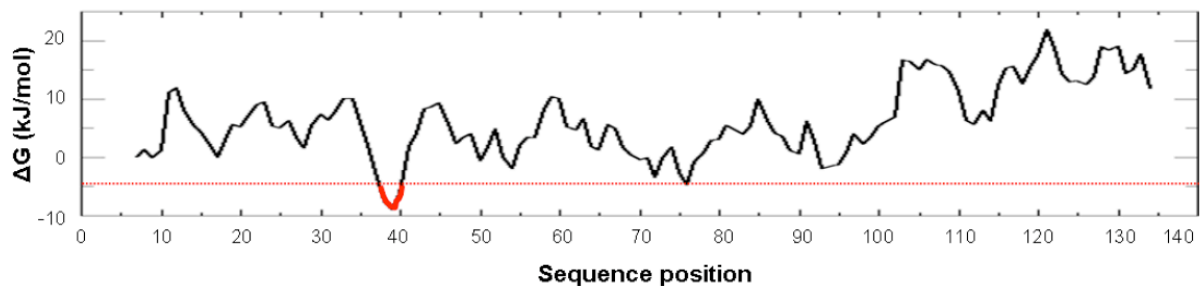

MDVFMKGLSKAKEGVWAAAEKTKQGVAAEAGKTKEGVLYVGSKTKEGVVHGVAIVAEKTKEQVNTNVGGAVVTGVTAVAQKTVEGAGSIAAATGFVHKDQLGKNEEGAPQEGILEDMPPVDPDNEAYEMPSEEGYQDYEP

SUPPLEMENTAL FIG. S6.  $\alpha$ -synuclein possess a single Hsp70 binding site. Free energies of binding shown as a function of the residue number within the  $\alpha$ -synuclein primary sequence, as deduced from the algorithm of Rudiger and co-workers (Rudiger *et al*, 1997), using a sliding window approach. The red dotted line indicates a -5 kJ/mol threshold of confidence, and the red segment of the solid line indicates the region within the  $\alpha$ -syn primary sequence predicted to be the Hsp70 binding site (residues 36-41, highlighted in red).
